# Supplementary material for: Decision-making in Nasal Dorsum Reconstruction in Revision Rhinoplasty
Source: PubMed Central journal article supplement — Plast Reconstr Surg Glob Open. 2024 Sep 6;12(9):e6139. doi: 10.1097/GOX.0000000000006139 (PMC11379486; doi:10.1097/gox.0000000000006139), 2024-09-06
Supplement: gox-12-e6139-s005.pdf [file gox-12-e6139-s005.pdf]

## 1. The Rhinoplasty Outcome Evaluation (ROE) Validated Spanish Version

|                                                                                                            | <b>Totalmente<br/>en<br/>desacuerdo</b> | <b>Parcialmente<br/>en<br/>desacuerdo</b> | <b>Ni en<br/>acuerdi ni<br/>en<br/>desacuerdo</b> | <b>Parcialmente<br/>de acuerdo</b> | <b>Totalmente<br/>de acuerdo</b> |
|------------------------------------------------------------------------------------------------------------|-----------------------------------------|-------------------------------------------|---------------------------------------------------|------------------------------------|----------------------------------|
| <b>PREGUNTAS:</b>                                                                                          |                                         |                                           |                                                   |                                    |                                  |
| <b>a) La apariencia de mi nariz es la mejor que pueda imaginar</b>                                         | <b>1</b>                                | <b>2</b>                                  | <b>3</b>                                          | <b>4</b>                           | <b>5</b>                         |
| <b>b) Puedo respirar perfectamente por mi nariz</b>                                                        | <b>1</b>                                | <b>2</b>                                  | <b>3</b>                                          | <b>4</b>                           | <b>5</b>                         |
| <b>c) A mis amigos y familia les gusta mi nariz</b>                                                        | <b>1</b>                                | <b>2</b>                                  | <b>3</b>                                          | <b>4</b>                           | <b>5</b>                         |
| <b>d) Nunca me he sentido limitado en mis actividades sociales laborales por la apariencia de mi nariz</b> | <b>1</b>                                | <b>2</b>                                  | <b>3</b>                                          | <b>4</b>                           | <b>5</b>                         |
| <b>e) Estoy seguro que la apariencia de mi nariz es la mejor que puedo tener</b>                           | <b>1</b>                                | <b>2</b>                                  | <b>3</b>                                          | <b>4</b>                           | <b>5</b>                         |
| <b>f) No me gustaría cambiar quirúrgicamente la apariencia y funcionalidad de mi nariz</b>                 | <b>1</b>                                | <b>2</b>                                  | <b>3</b>                                          | <b>4</b>                           | <b>5</b>                         |

2. The Rhinoplasty Outcome Evaluation (ROE) Validated in Spanish  
(translated to English)

|                                                                                                   | Totally in<br>disagree | Partially<br>disagree | Neither<br>agree, nor<br>disagree | Partially<br>Agree | Totally<br>agree |
|---------------------------------------------------------------------------------------------------|------------------------|-----------------------|-----------------------------------|--------------------|------------------|
| <b>QUESTIONS:</b>                                                                                 |                        |                       |                                   |                    |                  |
| <b>a) The appearance of my nose is the best I can imagine</b>                                     | <b>1</b>               | <b>2</b>              | <b>3</b>                          | <b>4</b>           | <b>5</b>         |
| <b>b) I can breathe perfectly through my nose.</b>                                                | <b>1</b>               | <b>2</b>              | <b>3</b>                          | <b>4</b>           | <b>5</b>         |
| <b>c) My friends and family like my nose</b>                                                      | <b>1</b>               | <b>2</b>              | <b>3</b>                          | <b>4</b>           | <b>5</b>         |
| <b>d) I have never felt constrained in my work social activities by the appearance of my nose</b> | <b>1</b>               | <b>2</b>              | <b>3</b>                          | <b>4</b>           | <b>5</b>         |
| <b>e) I am sure that the appearance of my nose is the best that I can have</b>                    | <b>1</b>               | <b>2</b>              | <b>3</b>                          | <b>4</b>           | <b>5</b>         |
| <b>f) I would not like to surgically change the appearance and functionality of my nose</b>       | <b>1</b>               | <b>2</b>              | <b>3</b>                          | <b>4</b>           | <b>5</b>         |
